# Supplementary material for: Optimised Method for Short-Chain Fatty Acid Profiling of Bovine Milk and Serum
Source: MDPI journal article supplement (doi:10.3390/molecules27020436), 2022-01-10
Supplement: s1 [file s1]

Supplementary Information:

**Optimised method for short-chain fatty acid profiling of bovine milk and serum**

Cheng Li<sup>1,2</sup>, Zhiqian Liu<sup>1</sup>, Carolyn Bath<sup>1</sup>, Leah Marett<sup>3,4</sup>, Jennie Pryce<sup>1,2</sup> and Simone  
Rochfort<sup>1,2</sup>

<sup>1</sup>Agriculture Victoria Research, AgriBio, 5 Ring Road, Bundoora, Victoria 3083, Australia

<sup>2</sup>School of Applied Systems Biology, La Trobe University, Bundoora, Victoria 3083,  
Australia

<sup>3</sup>Agriculture Victoria Research, Ellinbank Centre, Ellinbank, Victoria 3821, Australia

<sup>4</sup>Centre for Agricultural Innovation, School of Agriculture and Food, Faculty of Veterinary  
and Agricultural Sciences, The University of Melbourne, Victoria 3010, Australia

Corresponding author: [Zhiqian.liu@agriculture.vic.gov.au](mailto:Zhiqian.liu@agriculture.vic.gov.au)

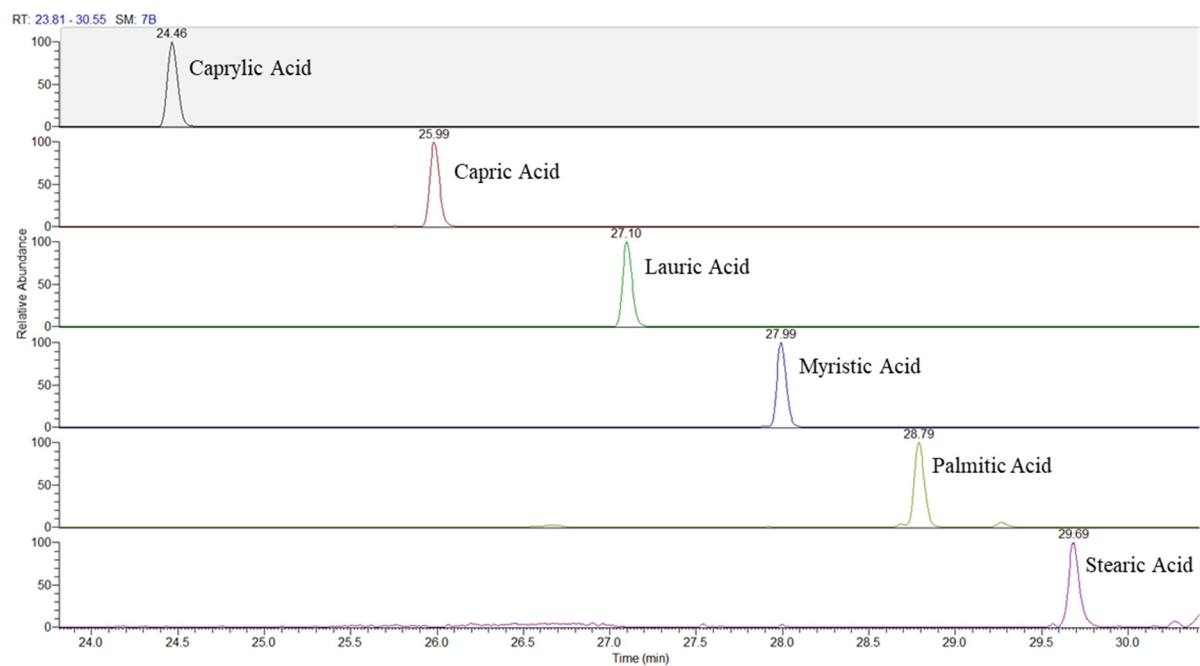

Figure S1. LC-MS profile of derivatised medium- and long-chain fatty acids acquired in positive ionisation mode from raw milk.
